# Supplementary material for: Genetic determinants of the molecular portraits of epithelial cancers
Source: PubMed Central journal article supplement (PMC6906458; doi:10.1038/s41467-019-13588-2), 2019-12-11
Supplement: 41467_2019_13588_MOESM1_ESM.pdf [file 41467_2019_13588_MOESM1_ESM.pdf]

## **Description of Additional Supplementary Files**

File Name: Supplementary Data 1

Description: Annotation of Gene Expression Signatures.

File Name: Supplementary Data 2

Description: Annotation of copy number segments.

File Name: Supplementary Data 3

Description: Summary of Elastic Net models for gene expression signatures.

File Name: Supplementary Data 4

Description: Summary of Elastic Net models for molecular subtypes and histology in breast cancers.

File Name: Supplementary Data 5

Description: Summary of Elastic Net models for protein expressions and clinical receptor statuses in breast cancers.

File Name: Supplementary Data 6

Description: Summary of AUC values for the prediction of gene expression signatures and protein expressions using Foundation One genomic test genes in TCGA breast cancer.

File Name: Supplementary Data 7

Description: Summary of Elastic Net models for somatic mutations in breast cancers.

File Name: Supplementary Data 8

Description: Summary of subtype-specific signature predictions in breast cancers.

File Name: Supplementary Data 9

Description: Summary of Elastic Net models for gene expression signatures in lung cancers.

File Name: Supplementary Data 10

Description: Summary of Pan Cancer signature predictions.

File Name: Supplementary Data 11:

Description: PAM50 subtypes for METABRIC.

File Name: Supplementary Data 12

Description: List of amplicon signatures.
